# Supplementary material
Source: HighWire-hosted journal article supplement (https://svn.smart01.highwire.org/content/6/3/476)
Supplement: inline-supplementary-material-2 [file inline-supplementary-material-2.pdf]

|                   | <b>Stroke</b>                            |                                                                  | <b>MI</b>                            |
|-------------------|------------------------------------------|------------------------------------------------------------------|--------------------------------------|
| <b>Label</b>      | Primary Model                            | Sensitivity Analysis                                             | Primary Model                        |
| <b>Source</b>     | Primary Baseline Stroke Model            | Sensitivity Baseline Stroke Model                                | Primary Baseline MI Model            |
| <b>Covariates</b> | Goodney et al <sup>19</sup>              | Rothwell et al <sup>20</sup>                                     | Lee et al <sup>14</sup>              |
|                   | Qualifying Event: Stroke/TIA             |                                                                  | Ischemic Heart Disease               |
|                   | Age > 70                                 | Sex                                                              | Congestive Heart Failure             |
|                   | Contralateral Occlusion                  | Baseline Blood Pressure                                          | History of Stroke                    |
|                   | Heart Failure                            |                                                                  | Insulin requiring Diabetes           |
|                   |                                          |                                                                  | Creatinine > 2.0                     |
|                   | <b>Treatment Models</b>                  |                                                                  |                                      |
|                   | <b>Stroke</b>                            | <b>MI</b>                                                        |                                      |
| <b>Label</b>      | Primary Model                            | Sensitivity Analysis                                             | Primary Model                        |
| <b>Outcome</b>    | Primary Stroke Treatment Model           | Sensitivity Stroke Treatment Model                               | Primary MI Treatment Model           |
| <b>Covariates</b> | Perioperative Stroke/Death               | Perioperative Stroke/Death                                       | Perioperative MI                     |
|                   | Primary Baseline Stroke Linear Predictor | Sensitivity Baseline Stroke Linear Predictor                     | Primary Baseline MI Linear Predictor |
|                   | Treatment (CEA vs. CAS)                  | Treatment (CEA vs. CAS)                                          | Treatment (CEA vs. CAS)              |
|                   | Symptomatic Status                       | Symptomatic Status Interaction between Treatment and Sensitivity |                                      |
|                   |                                          | Baseline Stroke Linear Predictor                                 |                                      |

Supplemental Table 1: Summary of the modeling approach

|                              | <b>CEA</b><br>(n = 65,252) | <b>CAS</b><br>(n = 11,017) |
|------------------------------|----------------------------|----------------------------|
| Age mean(SD)                 | 70.4 ( 9.6)                | 69.0 (11.3)                |
| Female N(%)                  | 25,845 (39.6%)             | 3,805 (34.5%)              |
| Symptomatic N(%)             | 20,887 (32.0%)             | 1,082 ( 9.8%)              |
| Diabetes N(%)                | 23,011 (35.3%)             | 3,981 (36.1%)              |
| CHF N(%)                     | 4,193 ( 6.4%)              | 871 ( 7.9%)                |
| CAD N(%)                     | 11,581 (17.7%)             | 2,004 (18.2%)              |
| Creatinine mg/dl             | 1.1 ( 0.5)                 | 1.1 ( 0.4)                 |
| Contralateral Occlusion N(%) | 4,083 ( 6.3%)              | 755 ( 6.9%)                |

**Supplemental Table 2: Summary of the SVS-VQI CEA/CAS Population**
